# Supplementary material for: Functional Comparison of Human Adenomatous Polyposis Coli (APC) and APC-Like in Targeting Beta-Catenin for Degradation
Source: PubMed Central journal article supplement (PMC3698177; doi:10.1371/journal.pone.0068072), 2013-07-01

Figure S4

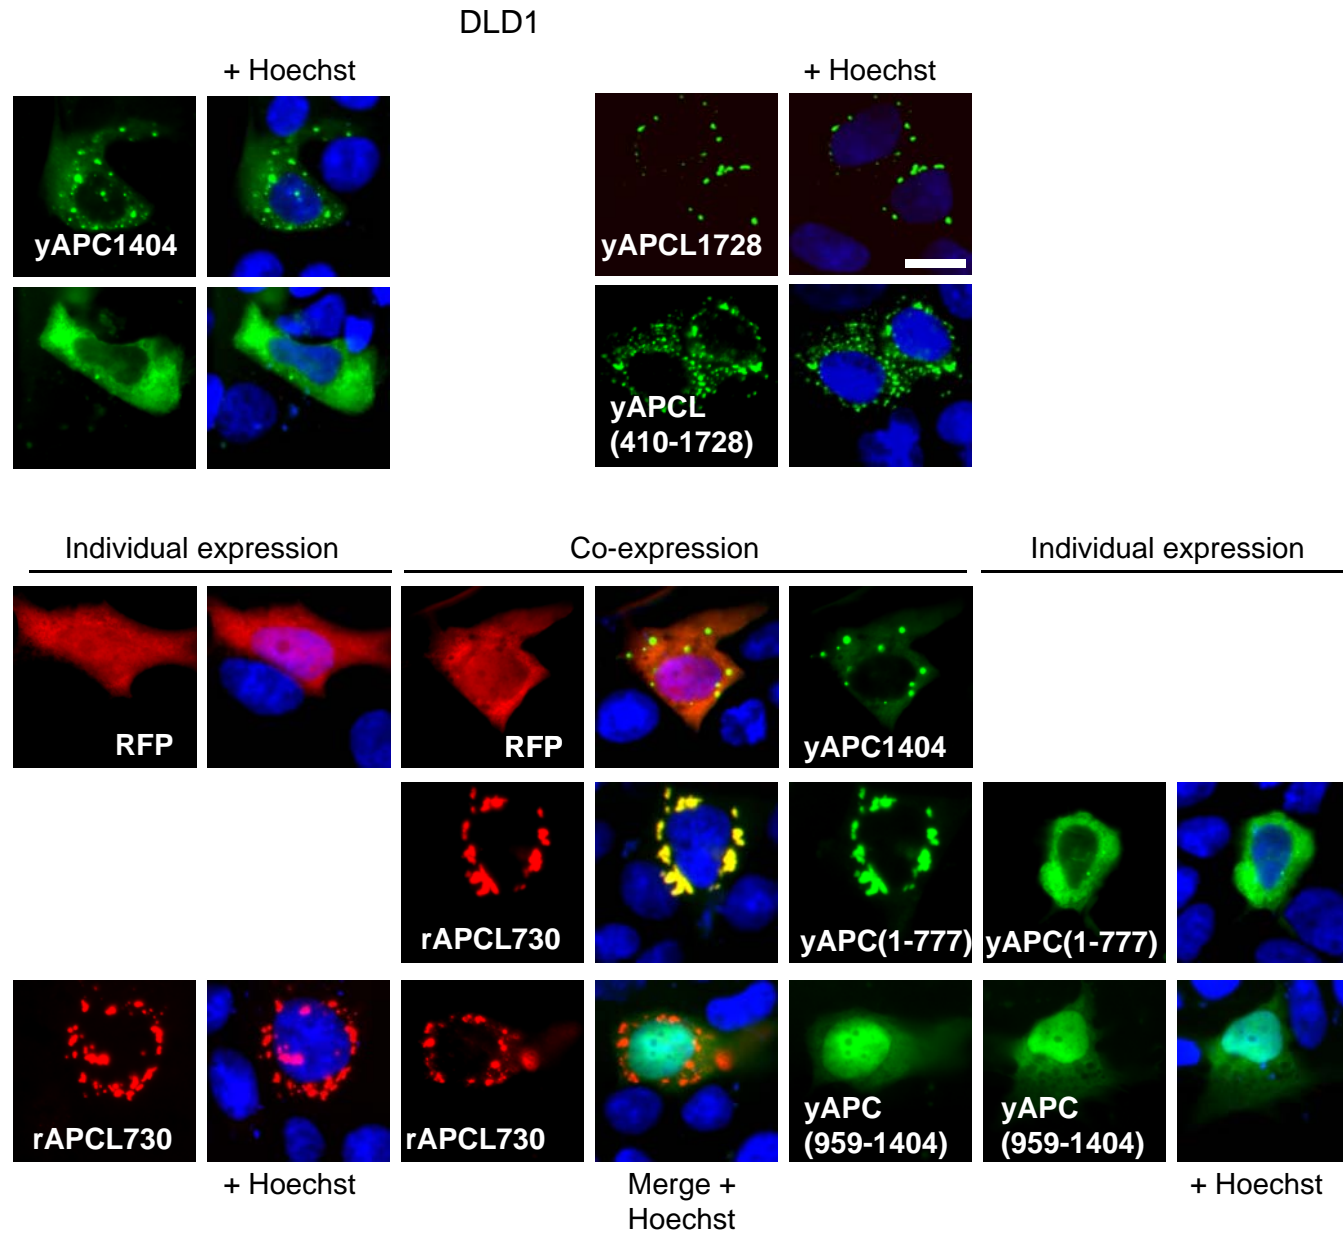

Supplement: pone.0068072.s004.pdf [file pone.0068072.s004.pdf]
